# Supplementary material for: CAM/TMA-DPH as a promising alternative to SYTO9/PI for cell viability assessment in bacterial biofilms
Source: Frontiers journal article supplement (doi:10.3389/fcimb.2024.1508016), 2025-01-21
Supplement: Table_1.pdf [file Table_1.pdf]

## **Supplementary information**

### **CAM/TMA-DPH as a promising alternative to SYTO9/PI for cell viability assessment in bacterial biofilms**

**Tinatini Tchatchiashvili<sup>1,2\*</sup>, Mateusz Jundzill <sup>1,2</sup>, Mike Marquet <sup>1</sup>, Kamran A. Mirza <sup>1,2</sup>, Mathias W. Pletz<sup>1,2</sup>, Oliwia Makarewicz <sup>1,2</sup>, Lara Thieme <sup>1,2</sup>**

<sup>1</sup>Institute of Infectious Disease and Infection Control, Jena University Hospital, Friedrich-Schiller-University Jena, Jena, 07747, Germany

<sup>2</sup>Leibniz Center for Photonics in Infection Research, 07747 Jena, Germany

#### **\* Correspondence:**

Tinatini Tchatchiashvili

Tinatini.tchatchiashvili@med.uni-jena.de

**Supplementary Table 1:** Quantitative results obtained from CFU counting and microscopic analysis of biofilm surface area coverage and their correlation as Spearman rank ( $r$ ). Staining results are presented as mean values  $\pm$  standard deviation.

| Bacterial strain                 | Treatment     | Concentration<br>in mg/L | CFU / mL           | Calcein stained biofilm |                       | SYTO9 – PI-stained biofilm |                       |
|----------------------------------|---------------|--------------------------|--------------------|-------------------------|-----------------------|----------------------------|-----------------------|
|                                  |               |                          |                    | Area coverage           | Spearman rank ( $r$ ) | Area coverage              | Spearman rank ( $r$ ) |
| <i>P. aeruginosa</i><br>MIBI685  | ciprofloxacin | 0                        | $6.05 \times 10^7$ | $56.80\% \pm 8.33\%$    | 0.91 (****)           | $0.56\% \pm 0.14\%$        | 0.65 (*)              |
|                                  |               | 1.25                     | $7.90 \times 10^5$ | $48.48\% \pm 3.57\%$    |                       | $0.31\% \pm 0.08\%$        |                       |
|                                  |               | 2.5                      | $5.31 \times 10^5$ | $45.25\% \pm 1.48\%$    |                       | $0.20\% \pm 0.07\%$        |                       |
|                                  |               | 10                       | $8.45 \times 10^4$ | $30.98\% \pm 6.99\%$    |                       | $0.24\% \pm 0.03\%$        |                       |
| <i>K. pneumoniae</i><br>IIMK 217 | ciprofloxacin | 0                        | $2.35 \times 10^8$ | $25.23\% \pm 12.35\%$   | 0.59 (*)              | $1.0\% \pm 0.20\%$         | – 0.04 (ns)           |
|                                  |               | 2                        | $5.59 \times 10^5$ | $2.30\% \pm 0.77\%$     |                       | $2.50\% \pm 1.70\%$        |                       |
|                                  |               | 4                        | $2.48 \times 10^5$ | $1.0\% \pm 0.3 \%$      |                       | $1.71\% \pm 1.28\%$        |                       |
|                                  |               | 8                        | $2.32 \times 10^5$ | $1.58\% \pm 1.27\%$     |                       | $7.71\% \pm 5.69\%$        |                       |
| <i>S. aureus</i> ATCC<br>43300   | vancomycin    | 0                        | $7.24 \times 10^8$ | $85.85\% \pm 2.42\%$    | 0.88 (****)           | $70.2\% \pm 6.99\%$        | 0.74 (**)             |
|                                  |               | 512                      | $1.18 \times 10^8$ | $30.42\% \pm 3.97\%$    |                       | $8.31\% \pm 2.50\%$        |                       |
|                                  |               | 2048                     | $6.22 \times 10^7$ | $26.76\% \pm 7.63\%$    |                       | $36.6\% \pm 5.94\%$        |                       |
|                                  |               | 10000                    | $5.50 \times 10^6$ | $0.34\% \pm 0.45\%$     |                       | $3.18\% \pm 1.45\%$        |                       |
| <i>E. faecium</i><br>MIBI701     | gentamicin    | 0                        | $5.45 \times 10^7$ | $4.13\% \pm 1.26\%$     | 0.83 (****)           | $5.37\% \pm 1.59\%$        | 0.79 (***)            |
|                                  |               | 64                       | $5.55 \times 10^6$ | $1.38\% \pm 0.38\%$     |                       | $0.75\% \pm 0.54\%$        |                       |
|                                  |               | 256                      | $8.21 \times 10^5$ | $0.62\% \pm 0.11\%$     |                       | $0.57\% \pm 0.54\%$        |                       |
|                                  |               | 1024                     | $4.78 \times 10^4$ | $0.51\% \pm 0.11\%$     |                       | $0.17\% \pm 0.08\%$        |                       |

$r$  = Spearman correlation rank. Significance was assumed at the  $p$  value  $< 0.05$  and was indicated by asterisks: \*  $< 0.05$ , \*\*  $< 0.01$ , \*\*\*  $< 0.001$ , \*\*\*\*  $< 0.0001$ , ns = not significant.
